# Supplementary material
Source: Springer Nature journal article supplement (https://www.springermedizin.de/resource/supplementary/13024_2013_521_MOESM6_ESM.pdf/9644394)
Supplement: MOESM6 [file 9644394]

Additional file 6

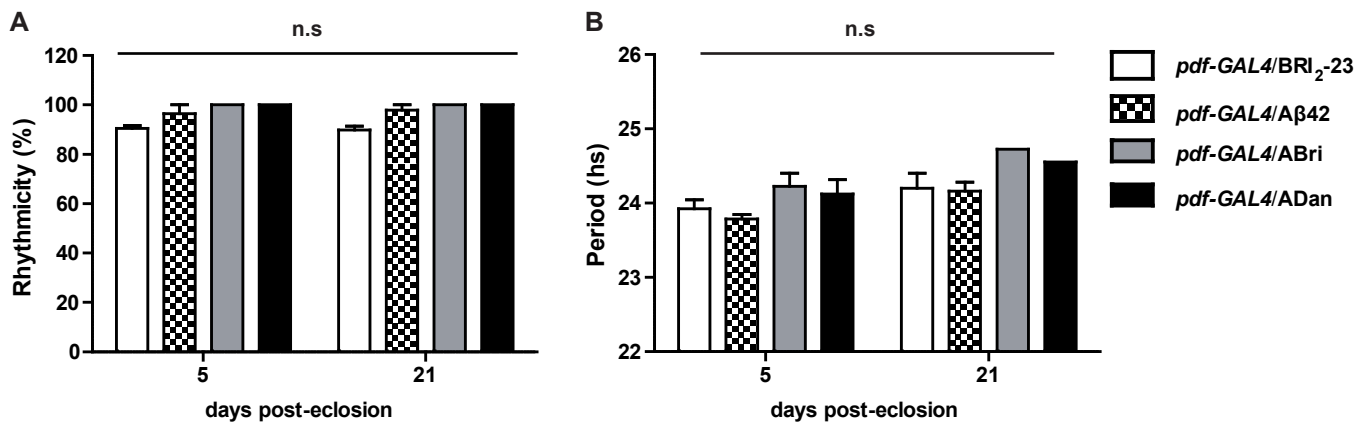

**Supp. Figure 4. The over expression of two copies of A $\beta$ 42, ABri and ADan in *pdf*-neurons did not affect the circadian behavior.** **A**, Percentage of rhythmic flies expressing 2 copies of amyloid peptides in *pdf* neurons at 5 and 21 days of age. The results show no differences among genotypes (bars represent the mean  $\pm$  SEM of two independent experiments). **B**, Average periods for BRI<sub>2-23</sub>, A $\beta$ 42, ABri and ADan-carrying lines. There is no difference in period values among the lines (bars represent the mean  $\pm$  SEM of two independent experiments).
